# Supplementary material for: Skill Enactment and Knowledge Acquisition in Digital Cognitive Behavioral Therapy for Depression and Anxiety: Systematic Review of Randomized Controlled Trials
Source: PubMed Central journal article supplement (PMC10267790; doi:10.2196/44673), 2023-05-31
Supplement: jmir_v25i1e44673_app2.pdf [file jmir_v25i1e44673_app2.pdf]

### Full Search Strategy 2000 to 2022

| <b>Ovid PsycINFO</b> 1806 to July Week 2 2022 |                                                                                                                                                                                                                          |         |
|-----------------------------------------------|--------------------------------------------------------------------------------------------------------------------------------------------------------------------------------------------------------------------------|---------|
| Search date: 26 July 2022                     |                                                                                                                                                                                                                          |         |
| #                                             | Searches                                                                                                                                                                                                                 | Results |
| 1                                             | (internet or web or online or icBT or i-CBT or eHealth or e-Health or cCBT or c-CBT or digital or computer or mHealth or m-Health or mobile or smartphone or virtual).ti,ab.                                             | 281941  |
| 2                                             | (internet or smartphone or computers).mp.                                                                                                                                                                                | 89765   |
| 3                                             | 1 or 2                                                                                                                                                                                                                   | 294352  |
| 4                                             | (depression or depressive or depressed or mood disorder or mood disorders or mood disordered or affective disorder or affective disorders or affective disordered or mood or affective or dysthymic or dysthymia).ti,ab. | 444460  |
| 5                                             | (depression or mood disorder or affect or dysthymic disorder).mp.                                                                                                                                                        | 583699  |
| 6                                             | 4 or 5                                                                                                                                                                                                                   | 693001  |
| 7                                             | (anxiety or anxious or phobic or phobia or phobias or panic or obsess* or compulsi* or worry).ti,ab.                                                                                                                     | 270885  |
| 8                                             | (anxiety or phobic disorders or panic).mp.                                                                                                                                                                               | 278768  |
| 9                                             | 7 or 8                                                                                                                                                                                                                   | 320140  |
| 10                                            | 6 or 9                                                                                                                                                                                                                   | 851470  |
| 11                                            | 3 and 10                                                                                                                                                                                                                 | 47379   |
| 12                                            | treatment effectiveness evaluation.sh.                                                                                                                                                                                   | 26868   |
| 13                                            | (random* and trial*).tw.                                                                                                                                                                                                 | 80381   |
| 14                                            | (random* and allocate*).tw.                                                                                                                                                                                              | 5997    |
| 15                                            | double blind.tw.                                                                                                                                                                                                         | 24382   |
| 16                                            | single blind.tw.                                                                                                                                                                                                         | 2316    |
| 17                                            | 12 or 13 or 14 or 15 or 16                                                                                                                                                                                               | 118952  |
| 18                                            | clinical trial.id.                                                                                                                                                                                                       | 2445    |
| 19                                            | clinical trial*.tw.                                                                                                                                                                                                      | 39868   |
| 20                                            | ((singl* or doubl* or trebl* or tripl*) adj5 blind).tw.                                                                                                                                                                  | 26528   |
| 21                                            | (clin* adj25 trial*).ti,ab.                                                                                                                                                                                              | 49172   |
| 22                                            | placebo*.tw.                                                                                                                                                                                                             | 43247   |
| 23                                            | placebo*.id.                                                                                                                                                                                                             | 6029    |
| 24                                            | placebo*.ti,ab.                                                                                                                                                                                                          | 42749   |
| 25                                            | wait list*.ab.                                                                                                                                                                                                           | 2848    |
| 26                                            | random*.ti,ab.                                                                                                                                                                                                           | 226331  |
| 27                                            | 18 or 19 or 20 or 21 or 22 or 23 or 24 or 25 or 26                                                                                                                                                                       | 278488  |
| 28                                            | 17 or 27                                                                                                                                                                                                                 | 295251  |
| 29                                            | 11 and 28                                                                                                                                                                                                                | 7657    |
| 30                                            | limit 29 to (human and yr="2000 -Current")                                                                                                                                                                               | 6891    |
| <b>Cochrane CENTRAL</b>                       |                                                                                                                                                                                                                          |         |
| Search date: 26 July 2022                     |                                                                                                                                                                                                                          |         |
| #                                             | Searches                                                                                                                                                                                                                 | Results |
| #1                                            | ("internet" OR "web" OR "online" OR "iCBT" OR "i-CBT" OR "eHealth" OR "e-Health" OR "cCBT" OR "c-CBT" OR "digital" OR "computer" OR                                                                                      | 89742   |

|          |                                                                                                                                                                                                                                                                                                                                                                                                                                                                     |                |
|----------|---------------------------------------------------------------------------------------------------------------------------------------------------------------------------------------------------------------------------------------------------------------------------------------------------------------------------------------------------------------------------------------------------------------------------------------------------------------------|----------------|
|          | "mHealth" OR "m-Health" OR "mobile" OR "smartphone" OR "virtual":ti,ab                                                                                                                                                                                                                                                                                                                                                                                              |                |
| #2       | ([mh internet] OR [mh smartphone] OR [mh computers]):ti,ab                                                                                                                                                                                                                                                                                                                                                                                                          | 6736           |
| #3       | #1 OR #2                                                                                                                                                                                                                                                                                                                                                                                                                                                            | 90708          |
| #4       | ("depression" OR "depressive" OR "depressed" OR "mood disorder" OR "mood disorders" OR "mood disordered" OR "affective disorder" OR "affective disorders" OR "affective disordered" OR "mood" OR "affective" OR "dysthymic" OR "dysthymia"):ti,ab                                                                                                                                                                                                                   | 102329         |
| #5       | ([mh depression] OR [mh "mood disorders"] OR [mh affect] OR [mh "dysthymic disorder"]):ti,ab                                                                                                                                                                                                                                                                                                                                                                        | 27959          |
| #6       | #4 OR #5                                                                                                                                                                                                                                                                                                                                                                                                                                                            | 105562         |
| #7       | ("anxiety" OR "anxious" OR "phobic" OR "phobia" OR "phobias" OR "panic" OR "obsess*" OR "compulsi*" OR "worry" OR "agoraphobia"):ti,ab                                                                                                                                                                                                                                                                                                                              | 58407          |
| #8       | ([mh anxiety] OR [mh "phobic disorders"] OR [mh panic]):ti,ab                                                                                                                                                                                                                                                                                                                                                                                                       | 10655          |
| #9       | #7 OR #8                                                                                                                                                                                                                                                                                                                                                                                                                                                            | 60023          |
| #10      | #6 OR #9                                                                                                                                                                                                                                                                                                                                                                                                                                                            | 133083         |
| #11      | #10 AND #3                                                                                                                                                                                                                                                                                                                                                                                                                                                          | 13801          |
| #12      | #10 AND #3<br>with Publication Year from 2000 to 2022, in Trials                                                                                                                                                                                                                                                                                                                                                                                                    | 13531          |
|          |                                                                                                                                                                                                                                                                                                                                                                                                                                                                     |                |
|          | <b>PubMed</b><br>Search date: 26 July 2022                                                                                                                                                                                                                                                                                                                                                                                                                          |                |
|          |                                                                                                                                                                                                                                                                                                                                                                                                                                                                     |                |
| <b>#</b> | <b>Searches</b>                                                                                                                                                                                                                                                                                                                                                                                                                                                     | <b>Results</b> |
| #1       | "internet"[Title/Abstract] OR "web"[Title/Abstract] OR "online"[Title/Abstract] OR "iCBT"[Title/Abstract] OR "i-CBT"[Title/Abstract] OR "eHealth"[Title/Abstract] OR "e-Health"[Title/Abstract] OR "cCBT"[Title/Abstract] OR "c-CBT"[Title/Abstract] OR "digital"[Title/Abstract] OR "computer"[Title/Abstract] OR "mHealth"[Title/Abstract] OR "m-Health"[Title/Abstract] OR "mobile"[Title/Abstract] OR "smartphone"[Title/Abstract] OR "virtual"[Title/Abstract] | 942,049        |
| #2       | "internet"[MeSH Terms] OR "smartphone"[MeSH Terms] OR "computers"[MeSH Terms]                                                                                                                                                                                                                                                                                                                                                                                       | 174,970        |
| #3       | #1 OR #2                                                                                                                                                                                                                                                                                                                                                                                                                                                            | 1,015,870      |
| #4       | "depression"[Title/Abstract] OR "depressive"[Title/Abstract] OR "depressed"[Title/Abstract] OR "mood disorder"[Title/Abstract] OR "mood disorders"[Title/Abstract] OR "mood disordered"[Title/Abstract] OR "affective disorder"[Title/Abstract] OR "affective disorders"[Title/Abstract] OR "affective disordered"[Title/Abstract] OR "mood"[Title/Abstract] OR "affective"[Title/Abstract] OR "dysthymic"[Title/Abstract] OR "dysthymia"[Title/Abstract]           | 594,241        |
| #5       | "mood disorders"[MeSH Terms] OR "depression"[MeSH Terms] OR "mood disorders"[MeSH Terms] OR "affect"[MeSH Terms] OR "dysthymic disorder"[MeSH Terms]                                                                                                                                                                                                                                                                                                                | 287,619        |
| #6       | #4 OR #5                                                                                                                                                                                                                                                                                                                                                                                                                                                            | 650,451        |
| #7       | "anxiety"[Title/Abstract] OR "anxious"[Title/Abstract] OR "phobic"[Title/Abstract] OR "phobia"[Title/Abstract] OR "phobias"[Title/Abstract] OR "panic"[Title/Abstract] OR "obsess*"[Title/Abstract] OR "compulsi*"[Title/Abstract] OR "worry"[Title/Abstract] OR "agoraphobia"[Title/Abstract]                                                                                                                                                                      | 290,202        |
| #8       | "anxiety"[MeSH Terms] OR "phobic disorders"[MeSH Terms] OR "panic"[MeSH Terms]                                                                                                                                                                                                                                                                                                                                                                                      | 116,131        |

|     |                                                                                                                                                                                                                                                                                                                                                                                                                                                                            |                |
|-----|----------------------------------------------------------------------------------------------------------------------------------------------------------------------------------------------------------------------------------------------------------------------------------------------------------------------------------------------------------------------------------------------------------------------------------------------------------------------------|----------------|
| #9  | #7 OR #8                                                                                                                                                                                                                                                                                                                                                                                                                                                                   | 316,546        |
| #10 | #6 OR #9                                                                                                                                                                                                                                                                                                                                                                                                                                                                   | 813,632        |
| #11 | #10 AND #3                                                                                                                                                                                                                                                                                                                                                                                                                                                                 | 42,037         |
| #12 | "randomised controlled trial"[Title/Abstract] OR "randomized controlled trial"[Title/Abstract] OR "randomised control trial"[Title/Abstract] OR "randomized control trial"[Title/Abstract] OR "rct"[Title/Abstract] OR "random trial"[Title/Abstract] OR "randomised trial"[Title/Abstract] OR "randomized trial"[Title/Abstract] OR "randomised"[Title/Abstract] OR "randomized"[Title/Abstract] OR "controlled trial"[Title/Abstract] OR "control trial"[Title/Abstract] | 755,053        |
| #13 | #11 AND #12                                                                                                                                                                                                                                                                                                                                                                                                                                                                | 7,023          |
| #14 | #13 AND ("2000/01/01"[Date - Publication]: "3000"[Date - Publication])                                                                                                                                                                                                                                                                                                                                                                                                     | 6,952          |
|     |                                                                                                                                                                                                                                                                                                                                                                                                                                                                            |                |
|     | <b>Scopus</b><br><b>Forward Citation Searches (published CBT skills usage measures)</b><br>Search date: 26 July 2022                                                                                                                                                                                                                                                                                                                                                       |                |
|     |                                                                                                                                                                                                                                                                                                                                                                                                                                                                            |                |
|     | <b>Measure/ Citation</b>                                                                                                                                                                                                                                                                                                                                                                                                                                                   | <b>Results</b> |
|     | Behavioral Activation for Depression Scale [46]                                                                                                                                                                                                                                                                                                                                                                                                                            | 269            |
|     | Behavioral Activation for Depression Scale-Short Form [47]                                                                                                                                                                                                                                                                                                                                                                                                                 | 112            |
|     | Cognitive-Behavioral Therapy Skills Questionnaire [48]                                                                                                                                                                                                                                                                                                                                                                                                                     | 47             |
|     | Skills of Cognitive Therapy [49]                                                                                                                                                                                                                                                                                                                                                                                                                                           | 55             |
|     | Competencies of Cognitive Therapy Scale [50]                                                                                                                                                                                                                                                                                                                                                                                                                               | 42             |
|     | Frequency of Actions and Thoughts Scale [51]                                                                                                                                                                                                                                                                                                                                                                                                                               | 10             |
|     | Ways or Responding Scale [52]                                                                                                                                                                                                                                                                                                                                                                                                                                              | 58             |
